# Supplementary material for: The Circulating miRNA Profile of Chronic Hepatitis D and B Patients Is Comparable but Differs from That of Individuals with HBeAg-Negative HBV Infection
Source: MDPI journal article supplement (doi:10.3390/v15112257), 2023-11-15
Supplement: s1 [file s1]

**Supplementary Table S1:** miRNAs with significant differential expression between ENI vs. CHB, but not between ENI and CHD.

| Assay          | ENI vs. CHB |                      | ENI vs. CHD |                       |
|----------------|-------------|----------------------|-------------|-----------------------|
|                | Fold change | Bonferroni           | Fold change | Bonferroni            |
| hsa-miR-625-3p | 2.58        | 4.7x10 <sup>-4</sup> | 2.50        | 8.01x10 <sup>-1</sup> |
| hsa-miR-142-5p | 2.45        | 6.1x10 <sup>-5</sup> | 1.79        | 3.82x10 <sup>-1</sup> |
| hsa-miR-223-3p | 3.09        | 1.6x10 <sup>-5</sup> | 1.63        | 1.00                  |
